# Supplementary material
Source: PubMed Central journal article supplement (PMC2818517)
Supplement: NIHMS160130-supplement-Supplementary_data.pdf [file NIHMS160130-supplement-Supplementary_data.pdf]

**Supplementary Material for the article:**Inagaki et al., *Human Mutation***A Palindromic AT-rich Repeat in the *NFI* Gene is Hypervariable in Humans and Evolutionarily Conserved Among Primates**

Hidehito Inagaki, Tamae Ohye, Hiroshi Kogo, Kouji Yamada, Hiroe Kowa, Tamim H. Shaikh, Beverly S. Emanuel, and Hiroki Kurahashi

**Supplementary Table S1.** SNP genotyping of the individuals, cell lines and primates

| No. or name       | ethnicity             | PATRR type |     | SNPs (distance from 17PATRR) |                     |                    |     |
|-------------------|-----------------------|------------|-----|------------------------------|---------------------|--------------------|-----|
|                   |                       |            |     | dbSNP2854306*<br>(-14 kb)    | 2854308*<br>(+4 kb) | 964288<br>(+17 kb) |     |
| Individuals       | 1                     | Japanese   | S/S | A/A                          | G/G                 | A/A                |     |
| 2                 | Japanese              | L/S        |     | A/G                          | G/A                 | A/G                |     |
| 3                 | Japanese              | L/L        |     | G/G                          | A/A                 | G/G                |     |
| 4                 | Japanese              | L/S        |     | A/G                          | G/A                 | A/G                |     |
| 5                 | Japanese              | L/S        |     | A/G                          | G/A                 | A/G                |     |
| 6                 | Japanese              | L/S        |     | A/G                          | G/A                 | A/G                |     |
| 7                 | Japanese              | L/S        |     | A/G                          | G/A                 | A/G                |     |
| 8                 | Japanese              | L/L        |     | G/G                          | A/A                 | G/G                |     |
| 9                 | Japanese              | L/S        |     | A/G                          | G/A                 | A/G                |     |
| 10                | Japanese              | L/S        |     | A/G                          | G/A                 | A/G                |     |
| 11                | Japanese              | S/S        |     | A/A                          | G/G                 | A/A                |     |
| 12                | non-Jpn               | L/S        |     | A/G                          | G/A                 | A/G                |     |
| 13                | Japanese              | L/S        |     | n.d.                         | n.d.                | A/G                |     |
| 14                | Japanese              | L/L        |     | G/G                          | A/A                 | G/G                |     |
| 15                | Japanese              | L/L        |     | G/G                          | A/A                 | G/G                |     |
| 16                | Japanese              | L/L        |     | G/G                          | A/A                 | G/G                |     |
| 17                | Japanese              | S/S        |     | A/A                          | G/G                 | A/A                |     |
| 18                | non-Jpn               | L/S        |     | A/G                          | G/A                 | A/G                |     |
| 19                | non-Jpn               | L/S        |     | A/G                          | G/A                 | A/G                |     |
| 20                | Japanese              | L/S        |     | A/G                          | G/A                 | A/G                |     |
| Cell lines        | 293                   |            | L/S | A/G                          | G/A                 | A/G                |     |
|                   | HeLa                  | Black      | L/S | A/G                          | G/A                 | A/G                |     |
|                   | HepG2                 | Caucasian  | L/S | A/G                          | G/A                 | A/G                |     |
|                   | HT1080                | Caucasian  | L/S | A/G                          | G/A                 | A/G                |     |
|                   | THP1                  |            | L/L | G/G                          | A/A                 | G/G                |     |
| Putative SNP type |                       | 17-L-PATRR |     | G                            | A                   | G                  |     |
|                   |                       | 17-S-PATRR |     | A                            | G                   | A                  |     |
| Primates          | Gorilla               |            |     | A/A                          | G/G                 | A/A                |     |
|                   | Chimpanzee (database) |            |     | A/A                          | A                   | G                  | A   |
|                   | Rhesus monkey         |            |     | A/A                          | G/G                 | A/A                |     |
|                   | African green monkey  |            |     | A/A                          | A/A                 | G/G                | A/A |
|                   | Tamarin               |            |     | n.d.                         | n.d.                | A/A                |     |
|                   | Owl monkey            |            |     | n.d.                         | n.d.                | n.d.               | A/A |

n.d.: not determined

\*Two SNPs were genotyped by PCR amplification and sequencing. To amplify from both human and primates, PCR primer pairs were designed on conserved exons and long-PCR reactions were carried out. The PCR and sequencing primers were the followings:

dbSNP2854306: PCR forward 5'-GGTATAGTTTGCTTTTGTTCAGG-3'

PCR reverse 5'-GACAACACTAGTCTAGCCAGAATGG-3'

Sequencing 5'-GCTTGGACATTACAAATTCTACTG-3'

dbSNP2854308: PCR forward 5'-AGTTGCTTAAAAGGACCTGACACTTA-3'

PCR reverse 5'-GTGTATTCACCTCAAATTTGTCACA-3'

Sequencing 5'- ATGGCATGGTATTACCATCCAG -3'

Figure S1

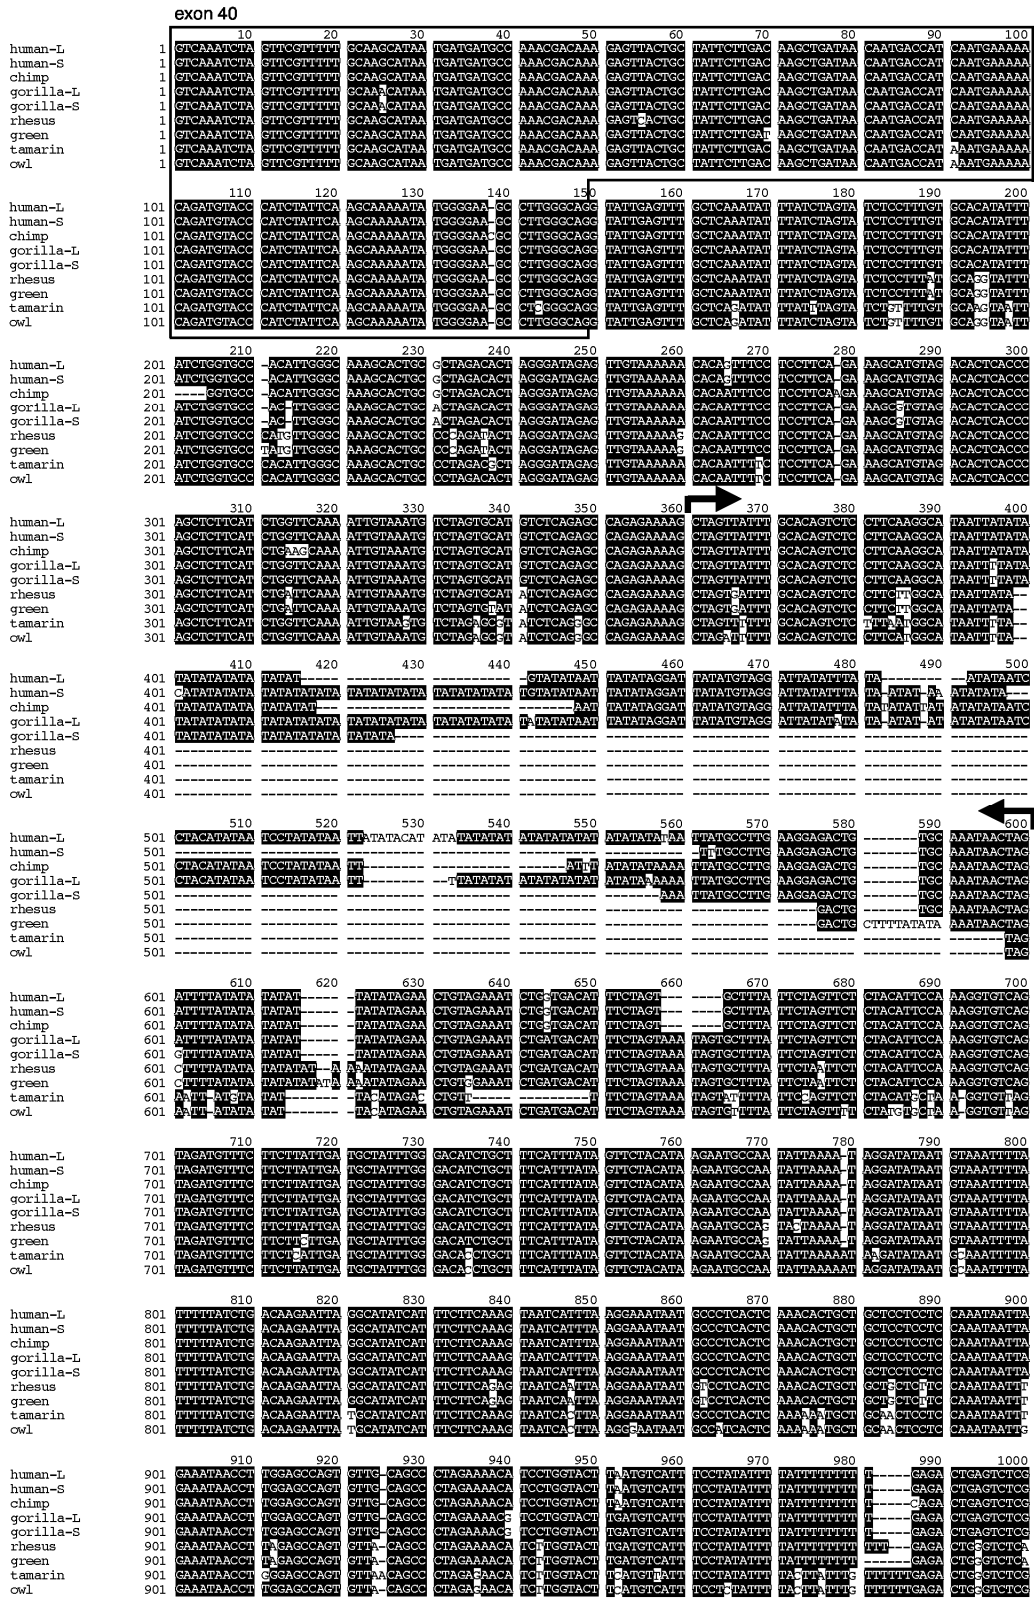

Figure S1 (continued)

|           | 1010 | 1020       | 1030        | 1040       | 1050        | 1060        | 1070        | 1080        | 1090        | 1100        |             |            |
|-----------|------|------------|-------------|------------|-------------|-------------|-------------|-------------|-------------|-------------|-------------|------------|
| human-L   | 1001 | CCTGTCCACC | CAGGCTGGA   | GTGAGTGGT  | ACAGTCTGGG  | CTCATTGCAA  | CCTCTGCTCC  | CCAGGCTCAA  | GTGACCCCTTC | CACCTCAGCC  | TCCCAGGTAG  |            |
| human-S   | 1001 | CCTGTCCACC | CAGGCTGGA   | GTGAGTGGT  | ACAGTCTGGG  | CTCATTGCAA  | CCTCTGCTCC  | CCAGGCTCAA  | GTGACCCCTTC | CACCTCAGCC  | TCCCAGGTAG  |            |
| chimp     | 1001 | CCTGTCCACC | CAGGCTGGA   | GTGAGTGGT  | ACAGTCTGGG  | CTCATTGCAA  | CCTCTGCTCC  | CCAGGCTCAA  | GTGACCCCTTC | CACCTCAGCC  | TCCCAGGTAG  |            |
| gorilla-L | 1001 | CCTGTCCACC | CAGGCTGGA   | GTGAGTGGT  | ACAGTCTGGG  | CTCATTGCAA  | CCTCTGCTCC  | CCAGGCTCAA  | GTGACCCCTTC | CACCTCAGCC  | TCCCAGGTAG  |            |
| gorilla-S | 1001 | CCTGTCCACC | CAGGCTGGA   | GTGAGTGGT  | ACAGTCTGGG  | CTCATTGCAA  | CCTCTGCTCC  | CCAGGCTCAA  | GTGACCCCTTC | CACCTCAGCC  | TCCCAGGTAG  |            |
| rhesus    | 1001 | CCTGTCCACC | CAGGCTGGA   | GTGAGTGGT  | ACAGTCTGGG  | CTCATTGCAA  | CCTCTGCTCC  | CCAGGCTCAA  | GTGACCCCTTC | CACCTCAGCC  | TCCCAGGTAG  |            |
| green     | 1001 | CCTGTCCACC | CAGGCTGGA   | GTGAGTGGT  | ACAGTCTGGG  | CTCATTGCAA  | CCTCTGCTCC  | CCAGGCTCAA  | GTGACCCCTTC | CACCTCAGCC  | TCCCAGGTAG  |            |
| tamarin   | 1001 | CCTGTCCACC | CAGGCTGGA   | GTGAGTGGT  | ACAGTCTGGG  | CTCATTGCAA  | CCTCTGCTCC  | CCAGGCTCAA  | GTGACCCCTTC | CACCTCAGCC  | TCCCAGGTAG  |            |
| owl       | 1001 | CCTGTCCACC | CAGGCTGGA   | GTGAGTGGT  | ACAGTCTGGG  | CTCATTGCAA  | CCTCTGCTCC  | CCAGGCTCAA  | GTGACCCCTTC | CACCTCAGCC  | TCCCAGGTAG  |            |
|           |      | 1110       | 1120        | 1130       | 1140        | 1150        | 1160        | 1170        | 1180        | 1190        | 1200        |            |
| human-L   | 1101 | CTGGGCTCAG | AGGTGCACAC  | CAACACACAC | GGCTAAATTTT | TGTATTTTTTT | TTTTTTTTTTT | TTTTTTT     | AGATA       | GATAGGGTATT | TGCCATGTTC  | CCCAGGCTGG |
| human-S   | 1101 | CTGGGCTCAG | AGGTGCACAC  | CAACACACAC | GGCTAAATTTT | TGTATTTTTTT | TTTTTTTTTTT | TTTTTTT     | TAGATA      | GATAGGGTATT | TGCCATGTTC  | CCCAGGCTGG |
| chimp     | 1101 | CTGGGCTCAG | AGGTGCACAC  | CAACACACAC | GGCTAAATTTT | TGTATTTTTTT | TTTTTTTTTTT | TTTTTTT     | TAGATA      | GATAGGGTATT | TGCCATGTTC  | CCCAGGCTGG |
| gorilla-L | 1101 | CTGGGCTCAG | AGGTGCACAC  | CAACACACAC | GGCTAAATTTT | TGTATTTTTTT | TTTTTTTTTTT | TTTTTTT     | AGATA       | GATAGGGTATT | TGCCATGTTC  | CCCAGGCTGG |
| gorilla-S | 1101 | CTGGGCTCAG | AGGTGCACAC  | CAACACACAC | GGCTAAATTTT | TGTATTTTTTT | TTTTTTTTTTT | TTTTTTT     | AGATA       | GATAGGGTATT | TGCCATGTTC  | CCCAGGCTGG |
| rhesus    | 1101 | CTGGGCTCAG | AGGTGCACAC  | CAACACACAC | GGCTAAATTTT | TGTATTTTTTT | TTTTTTTTTTT | TTTTTTT     | AGATA       | GATAGGGTATT | TGCCATGTTC  | CCCAGGCTGG |
| green     | 1101 | CTGGGCTCAG | AGGTGCACAC  | CAACACACAC | GGCTAAATTTT | TGTATTTTTTT | TTTTTTTTTTT | TTTTTTT     | AGATA       | GATAGGGTATT | TGCCATGTTC  | CCCAGGCTGG |
| tamarin   | 1101 | CTGGGCTCAG | AGGTGCACAC  | CAACACACAC | GGCTAAATTTT | TGTATTTTTTT | TTTTTTTTTTT | TTTTTTT     | AGATA       | GATAGGGTATT | TGCCATGTTC  | CCCAGGCTGG |
| owl       | 1101 | CTGGGCTCAG | AGGTGCACAC  | CAACACACAC | GGCTAAATTTT | TGTATTTTTTT | TTTTTTTTTTT | TTTTTTT     | AGATA       | GATAGGGTATT | TGCCATGTTC  | CCCAGGCTGG |
|           |      | 1210       | 1220        | 1230       | 1240        | 1250        | 1260        | 1270        | 1280        | 1290        | 1300        |            |
| human-L   | 1201 | CTTGAAGCTC | CTGGCCCTCAA | GCAATCCGGG | GGCTCAGGCC  | TCCCACAGTG  | CTGGGATTAC  | AAGCCGTGAGC | CACCTGACACC | AGCTCTGTAT  | TTTCAAAATTA |            |
| human-S   | 1201 | CTTGAAGCTC | CTGGCCCTCAA | GCAATCCGGG | GGCTCAGGCC  | TCCCACAGTG  | CTGGGATTAC  | AAGCCGTGAGC | CACCTGACACC | AGCTCTGTAT  | TTTCAAAATTA |            |
| chimp     | 1201 | CTTGAAGCTC | CTGGCCCTCAA | GCAATCCGGG | GGCTCAGGCC  | TCCCACAGTG  | CTGGGATTAC  | AAGCCGTGAGC | CACCTGACACC | AGCTCTGTAT  | TTTCAAAATTA |            |
| gorilla-L | 1201 | CTTGAAGCTC | CTGGCCCTCAA | GCAATCCGGG | GGCTCAGGCC  | TCCCACAGTG  | CTGGGATTAC  | AAGCCGTGAGC | CACCTGACACC | AGCTCTGTAT  | TTTCAAAATTA |            |
| gorilla-S | 1201 | CTTGAAGCTC | CTGGCCCTCAA | GCAATCCGGG | GGCTCAGGCC  | TCCCACAGTG  | CTGGGATTAC  | AAGCCGTGAGC | CACCTGACACC | AGCTCTGTAT  | TTTCAAAATTA |            |
| rhesus    | 1201 | CTTGAAGCTC | CTGGCCCTCAA | GCAATCCGGG | GGCTCAGGCC  | TCCCACAGTG  | CTGGGATTAC  | AAGCCGTGAGC | CACCTGACACC | AGCTCTGTAT  | TTTCAAAATTA |            |
| green     | 1201 | CTTGAAGCTC | CTGGCCCTCAA | GCAATCCGGG | GGCTCAGGCC  | TCCCACAGTG  | CTGGGATTAC  | AAGCCGTGAGC | CACCTGACACC | AGCTCTGTAT  | TTTCAAAATTA |            |
| tamarin   | 1201 | CTTGAAGCTC | CTGGCCCTCAA | GCAATCCGGG | GGCTCAGGCC  | TCCCACAGTG  | CTGGGATTAC  | AAGCCGTGAGC | CACCTGACACC | AGCTCTGTAT  | TTTCAAAATTA |            |
| owl       | 1201 | CTTGAAGCTC | CTGGCCCTCAA | GCAATCCGGG | GGCTCAGGCC  | TCCCACAGTG  | CTGGGATTAC  | AAGCCGTGAGC | CACCTGACACC | AGCTCTGTAT  | TTTCAAAATTA |            |
|           |      | 1310       | 1320        | 1330       | 1340        | 1350        | 1360        | 1370        | 1380        | 1390        | 1400        |            |
| human-L   | 1301 | CTATTTTATA | TGATGCTAC   | ATTACTGTCT | TAGAAAAGCA  | TAGAGACTCT  | TTGCAAGTGA  | CTGAAGATAG  | PATTGATAGA  | GATTTT      | -----       |            |
| human-S   | 1301 | CTATTTTATA | TGATGCTAC   | ATTACTGTCT | TAGAAAAGCA  | TAGAGACTCT  | TTGCAAGTGA  | CTGAAGATAG  | PATTGATAGA  | GATTTT      | -----       |            |
| chimp     | 1301 | CTATTTTATA | TGATGCTAC   | ATTACTGTCT | TAGAAAAGCA  | TAGAGACTCT  | TTGCAAGTGA  | CTGAAGATAG  | PATTGATAGA  | GATTTT      | -----       |            |
| gorilla-L | 1301 | CTATTTTATA | TGATGCTAC   | ATTACTGTCT | TAGAAAAGCA  | TAGAGACTCT  | TTGCAAGTGA  | CTGAAGATAG  | PATTGATAGA  | GATTTT      | -----       |            |
| gorilla-S | 1301 | CTATTTTATA | TGATGCTAC   | ATTACTGTCT | TAGAAAAGCA  | TAGAGACTCT  | TTGCAAGTGA  | CTGAAGATAG  | PATTGATAGA  | GATTTT      | -----       |            |
| rhesus    | 1301 | CTATTTTATA | TGATGCTAC   | ATTACTGTCT | TAGAAAAGCA  | TAGAGACTCT  | TTGCAAGTGA  | CTGAAGATAG  | PATTGATAGA  | GATTTT      | -----       |            |
| green     | 1301 | CTATTTTATA | TGATGCTAC   | ATTACTGTCT | TAGAAAAGCA  | TAGAGACTCT  | TTGCAAGTGA  | CTGAAGATAG  | PATTGATAGA  | GATTTT      | -----       |            |
| tamarin   | 1301 | CTATTTTATA | TGATGCTAC   | ATTACTGTCT | TAGAAAAGCA  | TAGAGACTCT  | TTGCAAGTGA  | CTGAAGATAG  | PATTGATAGA  | GATTTT      | -----       |            |
| owl       | 1301 | CTATTTTATA | TGATGCTAC   | ATTACTGTCT | TAGAAAAGCA  | TAGAGACTCT  | TTGCAAGTGA  | CTGAAGATAG  | PATTGATAGA  | GATTTT      | -----       |            |
|           |      | 1410       | 1420        | 1430       | 1440        | 1450        | 1460        | 1470        | 1480        | 1490        | 1500        |            |
| human-L   | 1401 | -----      | -----       | -----      | -----       | -----       | -----       | -----       | -----       | -----       | -----       |            |
| human-S   | 1401 | -----      | -----       | -----      | -----       | -----       | -----       | -----       | -----       | -----       | -----       |            |
| chimp     | 1401 | -----      | -----       | -----      | -----       | -----       | -----       | -----       | -----       | -----       | -----       |            |
| gorilla-L | 1401 | -----      | -----       | -----      | -----       | -----       | -----       | -----       | -----       | -----       | -----       |            |
| gorilla-S | 1401 | -----      | -----       | -----      | -----       | -----       | -----       | -----       | -----       | -----       | -----       |            |
| rhesus    | 1401 | -----      | -----       | -----      | -----       | -----       | -----       | -----       | -----       | -----       | -----       |            |
| green     | 1401 | -----      | -----       | -----      | -----       | -----       | -----       | -----       | -----       | -----       | -----       |            |
| tamarin   | 1401 | TTTGTAGAGC | GAGTTTCACT  | CTTGTACC   | AGACTGGAGT  | GCAATGGCGC  | AGTCTCAGCT  | CACCCAAATC  | TCCGCTTCT   | GGGTTCAGGC  | AATTCCTCTG  |            |
| owl       | 1401 | TTTGTAGAGC | GAGTTTCACT  | CTTGTACC   | AGACTGGAGT  | GCAATGGCGC  | AGTCTCAGCT  | CACCCAAATC  | TCCGCTTCT   | GGGTTCAGGC  | AATTCCTCTG  |            |
|           |      | 1510       | 1520        | 1530       | 1540        | 1550        | 1560        | 1570        | 1580        | 1590        | 1600        |            |
| human-L   | 1501 | -----      | -----       | -----      | -----       | -----       | -----       | -----       | -----       | -----       | -----       |            |
| human-S   | 1501 | -----      | -----       | -----      | -----       | -----       | -----       | -----       | -----       | -----       | -----       |            |
| chimp     | 1501 | -----      | -----       | -----      | -----       | -----       | -----       | -----       | -----       | -----       | -----       |            |
| gorilla-L | 1501 | -----      | -----       | -----      | -----       | -----       | -----       | -----       | -----       | -----       | -----       |            |
| gorilla-S | 1501 | -----      | -----       | -----      | -----       | -----       | -----       | -----       | -----       | -----       | -----       |            |
| rhesus    | 1501 | -----      | -----       | -----      | -----       | -----       | -----       | -----       | -----       | -----       | -----       |            |
| green     | 1501 | -----      | -----       | -----      | -----       | -----       | -----       | -----       | -----       | -----       | -----       |            |
| tamarin   | 1501 | CCTCAGGCTC | CTGAGTACCT  | GGGATPACAG | GCACGCCGCA  | CCATGCCOCAG | CTAATTTTTTT | ATATTTTTTAG | TAGAGACGGA  | GTTCACCAT   | GTTCACCAGG  |            |
| owl       | 1501 | CCTCAGGCTC | CTGAGTACCT  | GGGATPACAG | GCACGCCGCA  | CCATGCCOCAG | CTAATTTTTTT | ATATTTTTTAG | TAGAGACGGA  | GTTCACCAT   | GTTCACCAGG  |            |
|           |      | 1610       | 1620        | 1630       | 1640        | 1650        | 1660        | 1670        | 1680        | 1690        | 1700        |            |
| human-L   | 1601 | -----      | -----       | -----      | -----       | -----       | -----       | -----       | -----       | -----       | AA          |            |
| human-S   | 1601 | -----      | -----       | -----      | -----       | -----       | -----       | -----       | -----       | -----       | AA          |            |
| chimp     | 1601 | -----      | -----       | -----      | -----       | -----       | -----       | -----       | -----       | -----       | AA          |            |
| gorilla-L | 1601 | -----      | -----       | -----      | -----       | -----       | -----       | -----       | -----       | -----       | AA          |            |
| gorilla-S | 1601 | -----      | -----       | -----      | -----       | -----       | -----       | -----       | -----       | -----       | AA          |            |
| rhesus    | 1601 | -----      | -----       | -----      | -----       | -----       | -----       | -----       | -----       | -----       | AA          |            |
| green     | 1601 | -----      | -----       | -----      | -----       | -----       | -----       | -----       | -----       | -----       | AA          |            |
| tamarin   | 1601 | ATGGTCTCAA | TCTCTTGACC  | TCGTGATCCA | CCCGCTCCGG  | CCTCCCAAAG  | TGCTGGGAT   | ACAGGCTTGA  | GCCACCGCGC  | CGGCGCCGAT  | AGAGATTTTTA |            |
| owl       | 1601 | ATGGTCTCAA | TCTCTTGACC  | TCGTGATCCA | CCCGCTCCGG  | CCTCCCAAAG  | TGCTGGGAT   | ACAGGCTTGA  | GCCACCGCGC  | CGGCGCCGAT  | AGAGATTTTTA |            |
|           |      | 1710       | 1720        | 1730       | 1740        | 1750        | 1760        | 1770        | 1780        | 1790        | 1800        |            |
| human-L   | 1701 | AATTTTTGAA | TACCAAATCC  | TAAATCTCTG | AAGGAGTCAA  | ATGAATATAC  | TCATCCTTTC  | CTGGATATTT  | TATAATTAAT  | TGTAATTTACT | GACAGGCTG   |            |
| human-S   | 1701 | AATTTTTGAA | TACCAAATCC  | TAAATCTCTG | AAGGAGTCAA  | ATGAATATAC  | TCATCCTTTC  | CTGGATATTT  | TATAATTAAT  | TGTAATTTACT | GACAGGCTG   |            |
| chimp     | 1701 | AATTTTTGAA | TACCAAATCC  | TAAATCTCTG | AAGGAGTCAA  | ATGAATATAC  | TCATCCTTTC  | CTGGATATTT  | TATAATTAAT  | TGTAATTTACT | GACAGGCTG   |            |
| gorilla-L | 1701 | AATTTTTGAA | TACCAAATCC  | TAAATCTCTG | AAGGAGTCAA  | ATGAATATAC  | TCATCCTTTC  | CTGGATATTT  | TATAATTAAT  | TGTAATTTACT | GACAGGCTG   |            |
| gorilla-S | 1701 | AATTTTTGAA | TACCAAATCC  | TAAATCTCTG | AAGGAGTCAA  | ATGAATATAC  | TCATCCTTTC  | CTGGATATTT  | TATAATTAAT  | TGTAATTTACT | GACAGGCTG   |            |
| rhesus    | 1701 | AATTTTTGAA | TACCAAATCC  | TAAATCTCTG | AAGGAGTCAA  | ATGAATATAC  | TCATCCTTTC  | CTGGATATTT  | TATAATTAAT  | TGTAATTTACT | GACAGGCTG   |            |
| green     | 1701 | AATTTTTGAA | TACCAAATCC  | TAAATCTCTG | AAGGAGTCAA  | ATGAATATAC  | TCATCCTTTC  | CTGGATATTT  | TATAATTAAT  | TGTAATTTACT | GACAGGCTG   |            |
| tamarin   | 1701 | AATTTTTGAA | TACCAAATCC  | TAAATCTCTG | AAGGAGTCAA  | ATGAATATAC  | TCATCCTTTC  | CTGGATATTT  | TATAATTAAT  | TGTAATTTACT | GACAGGCTG   |            |
| owl       | 1701 | AATTTTTGAA | TACCAAATCC  | TAAATCTCTG | AAGGAGTCAA  | ATGAATATAC  | TCATCCTTTC  | CTGGATATTT  | TATAATTAAT  | TGTAATTTACT | GACAGGCTG   |            |
|           |      | 1810       | 1820        | 1830       | 1840        | 1850        | 1860        | 1870        | 1880        | 1890        | 1900        |            |
| human-L   | 1801 | TAATAAAAA  | CTAGTATTTT  | TCAGGCCTCA | GSTAAAATAG  | AATTTTCATA  | TTGATTAGGC  | TGTTCCAARG  | AATATTTTTT  | AATTAATAAT  | TAATAATTTA  |            |
| human-S   | 1801 | TAATAAAAA  | CTAGTATTTT  | TCAGGCCTCA | GSTAAAATAG  | AATTTTCATA  | TTGATTAGGC  | TGTTCCAARG  | AATATTTTTT  | AATTAATAAT  | TAATAATTTA  |            |
| chimp     | 1801 | TAATAAAAA  | CTAGTATTTT  | TCAGGCCTCA | GSTAAAATAG  | AATTTTCATA  | TTGATTAGGC  | TGTTCCAARG  | AATATTTTTT  | AATTAATAAT  | TAATAATTTA  |            |
| gorilla-L | 1801 | TAATAAAAA  | CTAGTATTTT  | TCAGGCCTCA | GSTAAAATAG  | AATTTTCATA  | TTGATTAGGC  | TGTTCCAARG  | AATATTTTTT  | AATTAATAAT  | TAATAATTTA  |            |
| gorilla-S | 1801 | TAATAAAAA  | CTAGTATTTT  | TCAGGCCTCA | GSTAAAATAG  | AATTTTCATA  | TTGATTAGGC  | TGTTCCAARG  | AATATTTTTT  | AATTAATAAT  | TAATAATTTA  |            |
| rhesus    | 1801 | TAATAAAAA  | CTAGTATTTT  | TCAGGCCTCA | GSTAAAATAG  | AATTTTCATA  | TTGATTAGGC  | TGTTCCAARG  | AATATTTTTT  | AATTAATAAT  | TAATAATTTA  |            |
| green     | 1801 | TAATAAAAA  | CTAGTATTTT  | TCAGGCCTCA | GSTAAAATAG  | AATTTTCATA  | TTGATTAGGC  | TGTTCCAARG  | AATATTTTTT  | AATTAATAAT  | TAATAATTTA  |            |
| tamarin   | 1801 | TAATAAAAA  | CTAGTATTTT  | TCAGGCCTCA | GSTAAAATAG  | AATTTTCATA  | TTGATTAGGC  | TGTTCCAARG  | AATATTTTTT  | AATTAATAAT  | TAATAATTTA  |            |
| owl       | 1801 | TAATAAAAA  | CTAGTATTTT  | TCAGGCCTCA | GSTAAAATAG  | AATTTTCATA  | TTGATTAGGC  | TGTTCCAARG  | AATATTTTTT  | AATTAATAAT  | TAATAATTTA  |            |
|           |      | 1910       | 1920        | 1930       | 1940        | 1950        | 1960        |             |             |             |             |            |
| human-L   | 1901 | GAGTGATTAA | AAACATGTTA  | TTTTTCCTTC | TCACACTAGAT | TACAGATCTG  | CTTGATGTTG  | TACTA       |             |             |             |            |
| human-S   | 1901 | GAGTGATTAA | AAACATGTTA  | TTTTTCCTTC | TCACACTAGAT | TACAGATCTG  | CTTGATGTTG  | TACTA       |             |             |             |            |
| chimp     | 1901 | GAGTGATTAA | AAACATGTTA  | TTTTTCCTTC | TCACACTAGAT | TACAGATCTG  | CTTGATGTTG  | TACTA       |             |             |             |            |
| gorilla-L | 1901 | GAGTGATTAA | AAACATGTTA  | TTTTTCCTTC | TCACACTAGAT | TACAGATCTG  | CTTGATGTTG  | TACTA       |             |             |             |            |
| gorilla-S | 1901 | GAGTGATTAA | AAACATGTTA  | TTTTTCCTTC | TCACACTAGAT | TACAGATCTG  | CTTGATGTTG  | TACTA       |             |             |             |            |
| rhesus    | 1901 | GAGTGATTAA | AAACATGTTA  | TTTTTCCTTC | TCACACTAGAT | TACAGATCTG  | CTTGATGTTG  | TACTA       |             |             |             |            |
| green     | 1901 | GAGTGATTAA | AAACATGTTA  | TTTTTCCTTC | TCACACTAGAT | TACAGATCTG  | CTTGATGTTG  | TACTA       |             |             |             |            |
| tamarin   | 1901 | GAGTGATTAA | AAACATGTTA  | TTTTTCCTTC | TCACACTAGAT | TACAGATCTG  | CTTGATGTTG  | TACTA       |             |             |             |            |
| owl       | 1901 | GAGTGATTAA | AAACATGTTA  | TTTTTCCTTC | TCACACTAGAT | TACAGATCTG  | CTTGATGTTG  | TACTA       |             |             | </          |            |
